# Supplementary material for: Deciduous dental caries status and associated risk factors among preschool children in Xuhui District of Shanghai, China
Source: PubMed Central journal article supplement (PMC6009057; doi:10.1186/s12903-018-0565-8), 2018-06-19
Supplement: 12903_2018_565_MOESM1_ESM.pdf [file 12903_2018_565_MOESM1_ESM.pdf]

## the 4th National Oral Health Survey (guardians)

Children ID  Investigator ID

Date of survey  year  month  day

Note:

1. Only children's parents or grandparents can fill out this questionnaire.

2. Please draw "√" in "" in front of the corresponding options.

1. You are the child's \_\_\_\_ ?

1)  Father    2)  Mother    3)  Grandfather    4)  Grandmother

2. What's your highest education level?

1)  Didn't attend school    2)  Primary school    3)  Middle school

4)  High school    5)  Technical secondary school

6)  Junior college    7)  Undergraduate    8)  Graduate and above

3. What's the feeding pattern of your child in the first 6 months after birth?

1)  Exclusive breastfeeding    2)  Predominant breastfeeding

3)  Exclusive artificial feeding    4)  Predominant artificial feeding

5)  Combination feeding

4. What's the frequency (times per week) of eating the following food of your child?

<1    1-2    3-4    5-6    7-8    >8

1) Desserts and candies                    

2) Sweet beverages                    

5. Does your child often eat sweets before sleep at night?

1)  Often (≥4 days per week)    2)  Sometimes (1-3 days per week)

3)  Rarely/never (< one day per week)

6. What's the age of starting tooth brushing of your child?

1)  <1-year-old    2)  1-year-old    3)  2-year-old

4)  3-year-old    5)  ≥4-year-old

7. What's the frequency (times per day) of brushing teeth of your child?

1)  <1    2)  1    3)  ≥2

8. Do you often help your child brush teeth?

1)  Rarely/never (< one day per week)    2)  Sometimes (1-3 days per week)

3)  Often (4-6 days per week)    4)  Everyday (7 days per week)

9. What's your assessment of your child's oral health condition?

Assessment: Very bad-----Fair-----Very good

Score:            1-----2-----3-----4-----5

              

10. Do you think the following statements are true or false?

|                                                                                      | True                     | False                    | Not sure                 |
|--------------------------------------------------------------------------------------|--------------------------|--------------------------|--------------------------|
| 1) Oral health is important to everyone's life.                                      | <input type="checkbox"/> | <input type="checkbox"/> | <input type="checkbox"/> |
| 2) It's necessary to do oral health examination regularly.                           | <input type="checkbox"/> | <input type="checkbox"/> | <input type="checkbox"/> |
| 3) The state of our teeth is inborn, which means it is irrelevant to our protection. | <input type="checkbox"/> | <input type="checkbox"/> | <input type="checkbox"/> |
| 4) The prevention of odontopathy depends on ourselves in the first place.            | <input type="checkbox"/> | <input type="checkbox"/> | <input type="checkbox"/> |
| 5) It's very important to protect children's six-year-teeth.                         | <input type="checkbox"/> | <input type="checkbox"/> | <input type="checkbox"/> |
| 6) The state of children's teeth can be affected by                                  |                          |                          |                          |

- mothers' teeth.
- 7) Gingival bleeding is normal when brushing teeth.
- 8) Bacteria can cause gingival inflammation.
- 9) Brushing teeth is useless for the prevention of  
gingival bleeding.
- 10) Bacteria can cause dental caries.
- 11) Eating sugars can cause dental caries.
- 12) There's no need to treat decayed primary teeth.
- 13) Pit and fissure sealing can prevent children's caries.
- 14) Fluoride is useless for protecting teeth.

**It's the end. Thanks for your participation!**
