# Supplementary material for: Deciduous dental caries status and associated risk factors among preschool children in Xuhui District of Shanghai, China
Source: PubMed Central journal article supplement (PMC6009057; doi:10.1186/s12903-018-0565-8), 2018-06-19
Supplement: 12903_2018_565_MOESM2_ESM.pdf [file 12903_2018_565_MOESM2_ESM.pdf]

## the 4th National Oral Health Survey (3-6 years old)

Follow-up No.  Children ID  Investigator ID

Gender  (1=boys 2=girls) Household registration  (1=Shanghai 2=Non-Shanghai)

Date of birth  year  month  day

Date of survey  year  month  day

Teeth fluoridization  (1=yes 2=no)

|              |                      |                      |                      |                      |                      |                      |                      |                      |                      |                      |                      |                      |
|--------------|----------------------|----------------------|----------------------|----------------------|----------------------|----------------------|----------------------|----------------------|----------------------|----------------------|----------------------|----------------------|
|              |                      | 55                   | 54                   | 53                   | 52                   | 51                   | 61                   | 62                   | 63                   | 64                   | 65                   |                      |
|              | 16                   | 15                   | 14                   | 13                   | 12                   | 11                   | 21                   | 22                   | 23                   | 24                   | 25                   | 26                   |
| Dental crown | <input type="text"/> | <input type="text"/> | <input type="text"/> | <input type="text"/> | <input type="text"/> | <input type="text"/> | <input type="text"/> | <input type="text"/> | <input type="text"/> | <input type="text"/> | <input type="text"/> | <input type="text"/> |
| Dental crown | <input type="text"/> | <input type="text"/> | <input type="text"/> | <input type="text"/> | <input type="text"/> | <input type="text"/> | <input type="text"/> | <input type="text"/> | <input type="text"/> | <input type="text"/> | <input type="text"/> | <input type="text"/> |
|              | 46                   | 45                   | 44                   | 43                   | 42                   | 41                   | 31                   | 32                   | 33                   | 34                   | 35                   | 36                   |
|              |                      | 85                   | 84                   | 83                   | 82                   | 81                   | 71                   | 72                   | 73                   | 74                   | 75                   |                      |

| Primary teeth | Permanent teeth | Caries status                                   |
|---------------|-----------------|-------------------------------------------------|
| A             | 0               | Sound                                           |
| B             | 1               | Coronal caries                                  |
| C             | 2               | Filled w/caries                                 |
| D             | 3               | Filled, no caries                               |
| E             | 4               | Missing due to caries                           |
| X             | 5               | Missing for any another reason                  |
| F             | 6               | Fissure sealant                                 |
| G             | 7               | Fixed dental prosthesis/crown, abutment, veneer |
| X             | 8               | Unerupted                                       |
| T             | T               | Trauma                                          |
| N             | 9               | Not recorded                                    |

Immediate (urgent) treatment needed  (1=yes 2=no)

Type of table  (1=original table 2=recheck table)
